# Supplementary material
Source: PubMed Central journal article supplement (PMC10201609)

**Figure S1**

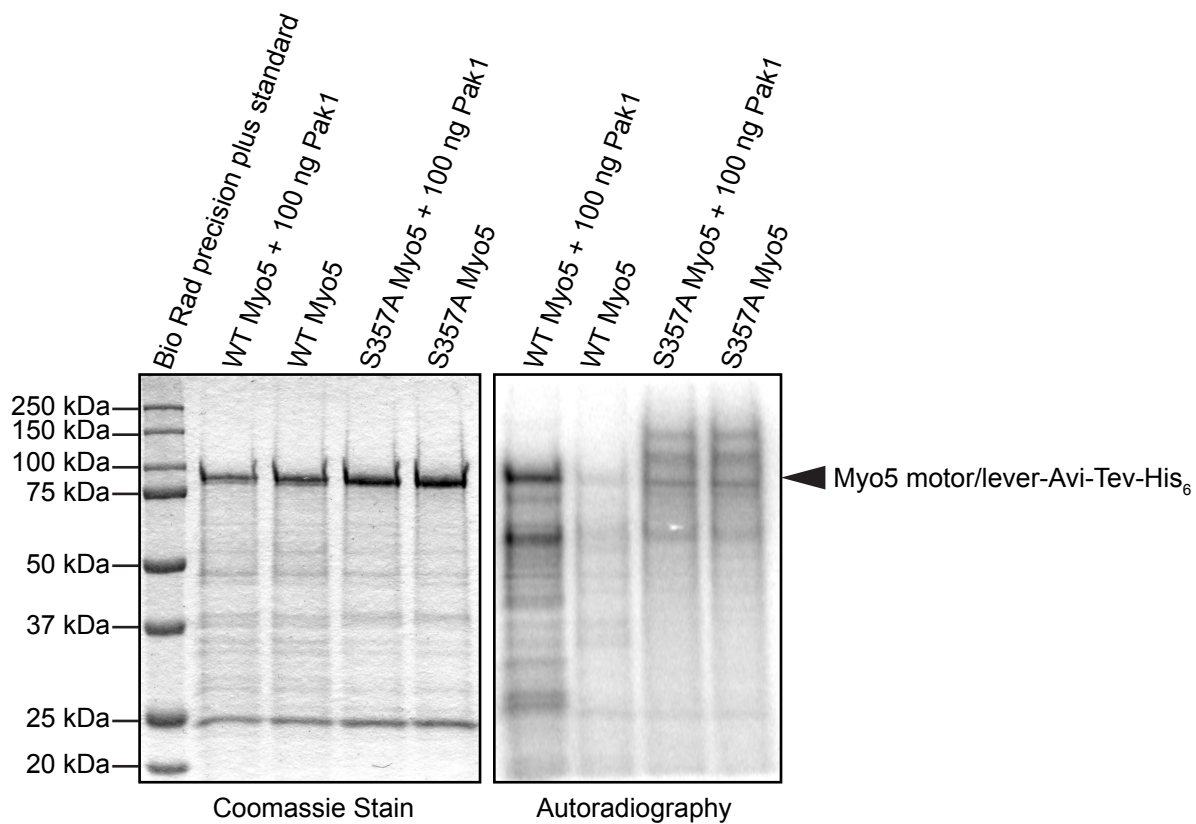

Supplement: media-1.pdf [file media-1.pdf]
